# Supplementary material for: An evolutionary solution of terrestrial isopods to cope with low atmospheric oxygen levels
Source: Oxford University Press journal article supplement (doi:10.1242/jeb.156661), 2017-01-01
Supplement: jeb156661supp.pdf [file jeb156661supp.pdf]

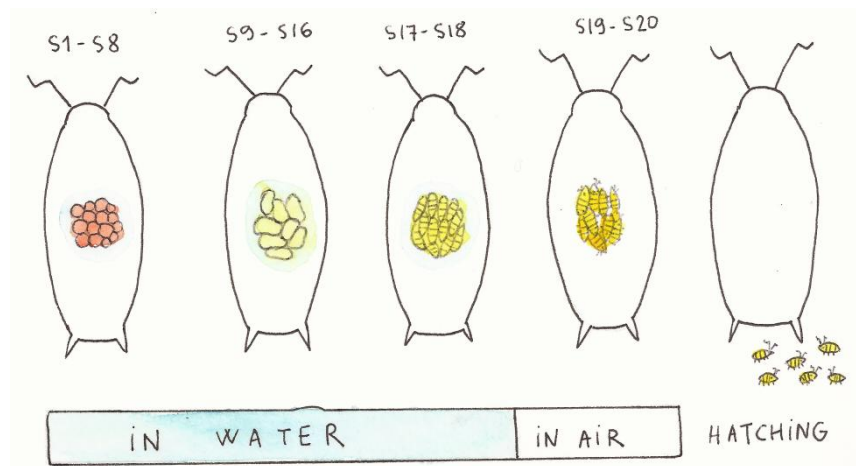

**Fig. S1** Early ontogenetic development of the terrestrial isopod *Porcellio scaber*. Progeny development starts after oviposition within the brood pouch (*marsupium*), which is filled with marsupial liquid (Hoese and Janssen, 1989; Yoshizawa and Wright, 2011). The marsupium is formed by five pairs of oostegites during parturial molt (Csonka et al., 2015; Hatchett, 1947). Oostegites are leaf-like overlapping appendages, lateral extensions of the coxae of the walking legs (Akahira, 1956). Milatović et al. (2010) described twenty discrete stages (S1-S20) of brood pouch development in *P. scaber* based on microscopic anatomy. Development in water phase lasts from S1 to S18 (88-96% development). During this period, the color of the brood changes from red (eggs, S1-S8) to green (embryos, S9-16) and then to yellow (manca stage, S17-S18; Milatović et al., 2010). The yolk sac (green in color) is gradually reduced and at S15 is completely enclosed inside the hepatopancreatic glands that appear as two green stripes extending from the cranial to the caudal side of the body. Individual offspring are in contact with special protrusions within marsupial cavity, the *cotyledons*, through which the female provides oxygen (Csonka et al., 2015; Hoese and Janssen, 1989). The brood pouch conspicuously swells during S18 due to water uptake, through which offspring acquire calcium ions for cuticle mineralization (Ouyang and Wright, 2005). Characteristic setae and spines on appendages and cuticular scales can be observed during S18 (see also Mrak et al., 2012). By the end of the water phase (aqueous phase), the brood pouch appears milky (blurry) in color; cotyledons are considerably reduced and are no longer in contact with a brood (Hoese and Janssen, 1989). The last two stages (S19 and S20) are characterized by the lack of marsupial liquid (gaseous phase). Oostegites are transparent, and manca show active leg movement (Milatović et al., 2010). Additionally, hepatopancreatic glands are reduced and do not extend to the caudal part of body. Cuticular scales have a rough surface (S20). At this developmental stage, the manca are ready to hatch from the brood pouch. The manca stage differs from the juvenile stage in the lack of the seventh pair of legs, which form during post-marsupial development (Montesanto et al., 2012; Zimmer, 2002).

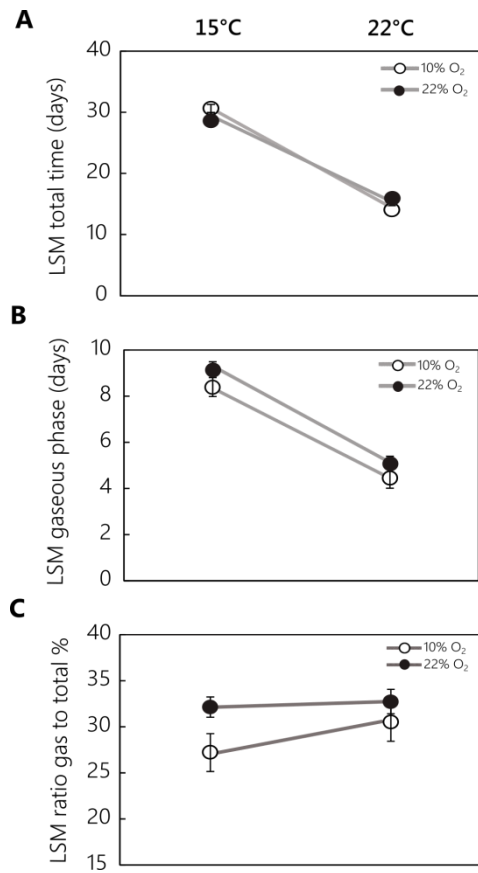

**Fig. S2** The combined effect of ambient temperature (15°C and 22°C) and oxygen level (10% and 22%) on developmental phases within the brood pouch of the terrestrial isopod *Porcellio scaber*. (A) Total developmental time. (B) Length of gaseous phase. (C) Proportion of gaseous phase to total length of brood pouch development. Data show least-square means  $\pm$  SE from the final models with interaction between temperature and oxygen.

**Tab. S1** The effect of ambient temperature (15°C and 22°C) and oxygen level (10% and 22% O<sub>2</sub>) on the duration of first 12 stages of intramarsupial development of terrestrial isopod *Porcellio scaber*. Our study employs a more conservative approach to determine the onset of marsupial development, starting from the stage 13 that can be precisely associated with a single developmental event (Milatović et al., 2010).

|                                          | 22% oxygen                        |              | 10% oxygen    |              |
|------------------------------------------|-----------------------------------|--------------|---------------|--------------|
|                                          | 22°C                              | 15°C         | 22°C          | 15°C         |
|                                          | duration in days<br>(sample size) |              |               |              |
| Marsupial development<br>first 12 stages | 3-16<br>(60)                      | 1-16<br>(26) | 15-31<br>(87) | 7-41<br>(39) |

**Tab. S2** The effect of ambient temperature (15°C and 22°C) and oxygen level (10% and 22% O<sub>2</sub>) on mortality of progeny developing in aqueous and gaseous phase within motherly brood pouch of terrestrial isopod females *Porcellio scaber*.

|               | 22% oxygen                   |              | 10% oxygen   |              | df    | oxygen        | temperature   | temperature x<br>oxygen |
|---------------|------------------------------|--------------|--------------|--------------|-------|---------------|---------------|-------------------------|
|               | 22°C                         | 15°C         | 22°C         | 15°C         |       |               |               |                         |
|               | mortality %<br>(sample size) |              |              |              |       | F value<br>p  |               |                         |
| Aqueous phase | 36.7<br>(60)                 | 38.5<br>(26) | 37.9<br>(87) | 61.6<br>(39) | 1,208 | 2.52<br>0.114 | 2.76<br>0.098 | 2.01<br>0.158           |
| Gaseous phase | 13.6<br>(60)                 | 0<br>(26)    | 3<br>(87)    | 0<br>(39)    | 1,118 | 0<br>0.999    | 0<br>0.977    | 0<br>0.999              |

## Supplemental References

---

**Akahira, Y.** (1956). The function of thoracic processes found in females of the common wood-louse, *Porcellio scaber*. *Journal of the Faculty of Science Hokkaido University* **12**, 493-498.

**Csonka, D., Halasy, K. and Hornung, E.** (2015). Histological studies on the marsupium of two terrestrial isopods (Crustacea, Isopoda, Oniscidea). *Zookeys*, 81-92.

**Hatchett, S. P.** (1947). Biology of the Isopoda of Michigan. *Ecological Monographs* **17**, 47-79.

**Hoesel, B. and Janssen, H. H.** (1989). Morphological and physiological-studies on the marsupium in terrestrial isopods. *Monitore Zoologico Italiano, Nuova Serie, Monografia* **4**, 153-173.

**Milatovič, M., Kostanjšek, R. and Štrus, J.** (2010). Ontogenetic development of *Porcellio scaber*: Staging based on microscopic anatomy. *Journal of Crustacean Biology* **30**, 225-235.

**Montesanto, G., Pizzo, G. M., Caruso, D. and Lombardo, B. M.** (2012). The postmarsupial development of *Porcellio siculoccidentalis*, with some data on reproductive biology (Crustacea, Isopoda, Oniscidea). *Zookeys*, 87-101.

**Mrak, P., Znidarsic, N., Tusek-Znidaric, M., Klepal, W., Gruber, D. and Strus, J.** (2012). Egg envelopes and cuticle renewal in *Porcellio* embryos and marsupial manca. *Zookeys*, 55-72.

**Ouyang, D. and Wright, J.** (2005). Calcium accumulation in eggs and mancas of *Armadillidium vulgare* (Isopoda : Oniscidea). *Journal of Crustacean Biology* **25**, 420-426.

**Yoshizawa, A. and Wright, J.** (2011). Ionic composition and ion provisioning in marsupial fluid of terrestrial isopods (Isopoda: Oniscidea). *Crustaceana* **84**, 1307-1324.

**Zimmer, M.** (2002). Postembryonic ontogenetic development in *Porcellio scaber* (Isopoda: Oniscidea): The significance of food. *Invertebrate Reproduction & Development* **42**, 75-82.

---
